# Supplementary material
Source: Springer Nature journal article supplement (https://www.springermedizin.de/resource/supplementary/12877_2012_794_MOESM2_ESM.pdf/9440348)
Supplement: MOESM2 [file 9440348]

**Meaning unit:**

“It felt like it wasn’t a question of if, but rather when she was going to fall. And she did.”

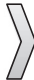

**Code:**

Not if, but  
when

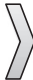

**Subcategory:**

Always ready
